# Supplementary material for: Design and description of the MUSICA IASI full retrieval product
Source: Copernicus journal article supplement (doi:10.5194/essd-2021-75), 2021-04-12
Supplement: Supplementary file [file essd-2021-75-AC2-supplement.pdf]

We would like to thank the referee for their interest in our work and for revising our manuscript.

The IASI interferometer data are of great significance for global atmospheric research. The authors demonstrated a high professional quality of spectra analysis and state-of-art retrieval algorithm.

Thanks!

A rather large TOTAL data volume is not a serious disadvantage, a real disadvantage is archiving orbit-by-orbit mode. A global coverage is not necessary for many applications, but users have to download global data and delete unnecessary information to save memory. Downloading of ~ 1 TB (one year) may take ~ 50 hours. It may be suggested a simple filtering service of a type as follows.

1) Reading standard .nc file; 2) selecting user-defined list of variables; 3) writing of data in a new .nc file.

We fully agree with the referee that it would be highly desirable to set up a user-friendly data framework that allows the download of user defined MUSICA IASI data packages. Actually, the development and establishment of such framework is exactly the project idea for which we currently try to acquire funds (decision on this proposal is expected by the end of the year).

We hope for the understanding of the referee and the community that this needs additional development work and at this stage we can only declare our firm intention to go into this direction and that we are already intensively working on the acquisition of respective funds.
